# Supplementary material
Source: PubMed Central journal article supplement (PMC5637454)
Supplement: NIHMS907128-supplement-1.pdf [file NIHMS907128-supplement-1.pdf]

| <b>Sodium deficiency or aldosterone excess model</b> |                   | <b>Aldosterone (pg/ml)</b> |
|------------------------------------------------------|-------------------|----------------------------|
| <b>Diuresis</b>                                      | Furosemide + Chow | 420.7 ± 96.1               |
|                                                      | Furosemide + LSD  | 937.9 ± 60.0**             |
| <b>Sodium Deprivation</b>                            | Chow              | 484.1 ± 74.2               |
|                                                      | LSD               | 904.7 ± 44.8***            |
| <b>Osmotic Minipump</b>                              | Vehicle           | 380.8 ± 63.9               |
|                                                      | Aldosterone       | 1022.1 ± 192.6**           |

**Table S1, related to Figure 1. Plasma aldosterone levels from sodium deficiency and chronic infusion studies.**

Plasma aldosterone levels were measured by ELISA. Diuresis and sodium deprivation experiments had 6 mice/group, while osmotic pump experiments had 7-8 mice/group. Unpaired two-tailed t-test, \*\**P* < 0.01, \*\*\**P* < 0.001. Data are presented as mean ± SEM.

A

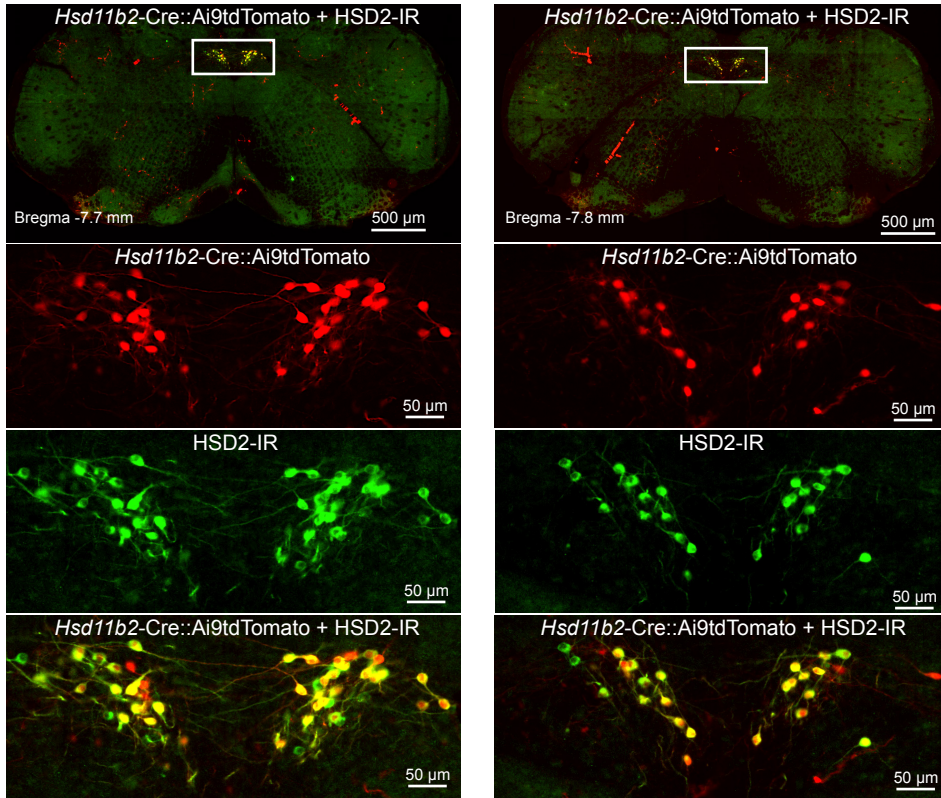

B

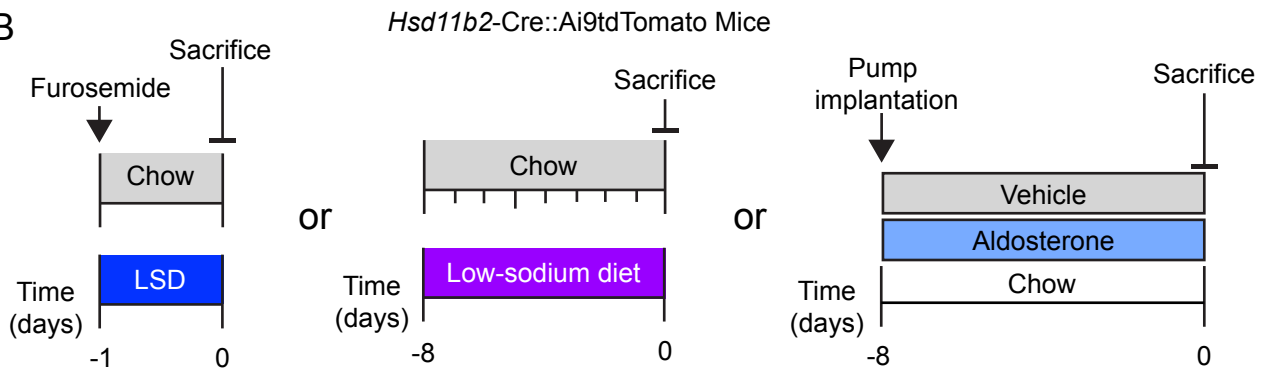

C

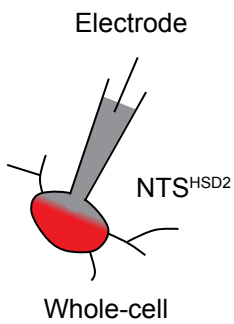

D

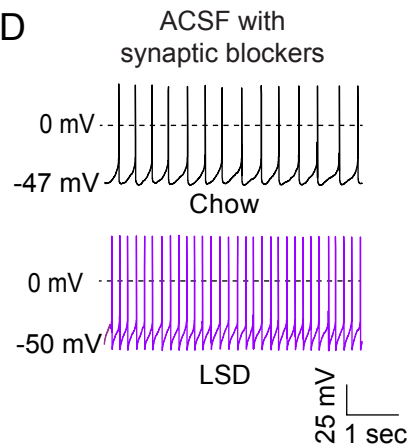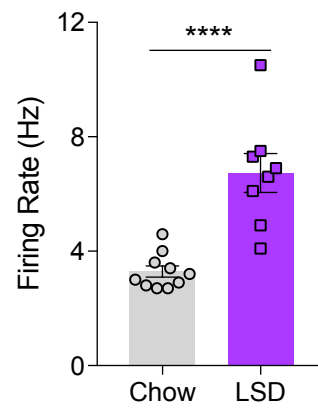

E

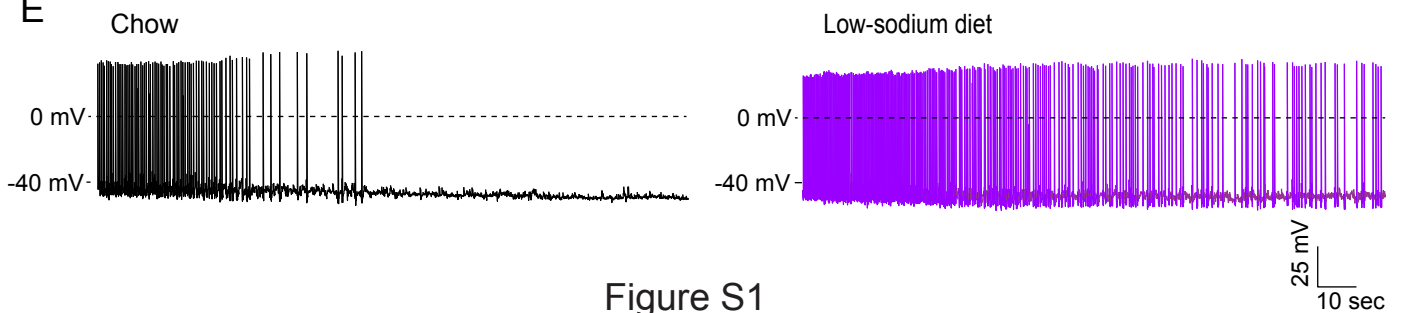

Figure S1

**Figure S1, related to Figure 1: Rundown of activity in whole-cell recordings of NTS<sup>HSD2</sup> neurons.**

All recordings were performed in the presence of synaptic blockers. Data are presented as mean  $\pm$  SEM.

**A)** Validation of NTS tdTomato expression in *Hsd11b2*-Cre::Ai9tdTomato mice at two levels of the hindbrain. Top panels show low magnification images of *Hsd11b2*-Cre::Ai9tdTomato expression with HSD2 immunoreactivity (HSD2-IR). Below low magnification images are high magnification images of the NTS depicting *Hsd11b2*-Cre::Ai9tdTomato (top), HSD2-IR (middle), and *Hsd11b2*-Cre::Ai9tdTomato expression + HSD2-IR (bottom).

**B)** Schematics of experimental sodium deficiency and aldosterone infusion protocols. **C)** Schematic of whole-cell recordings.

**D)** Representative traces of whole-cell patch-clamp recordings immediately after breakthrough (left) and summary (right) of NTS<sup>HSD2</sup> neuron activity from mice fed standard chow (Chow; top) or low sodium diet (LSD; bottom) for 8-12 days (Chow: n = 10 neurons from 3 mice; LSD: n = 8 neurons from 3 mice). Minimum and 0 mV membrane potentials are labeled in the representative traces for each treatment. Unpaired two-tailed t-test, \*\*\*\* $P < 0.0001$ .

**E)** Representative long-term whole-cell recordings of NTS<sup>HSD2</sup> neurons from Chow and LSD fed mice.

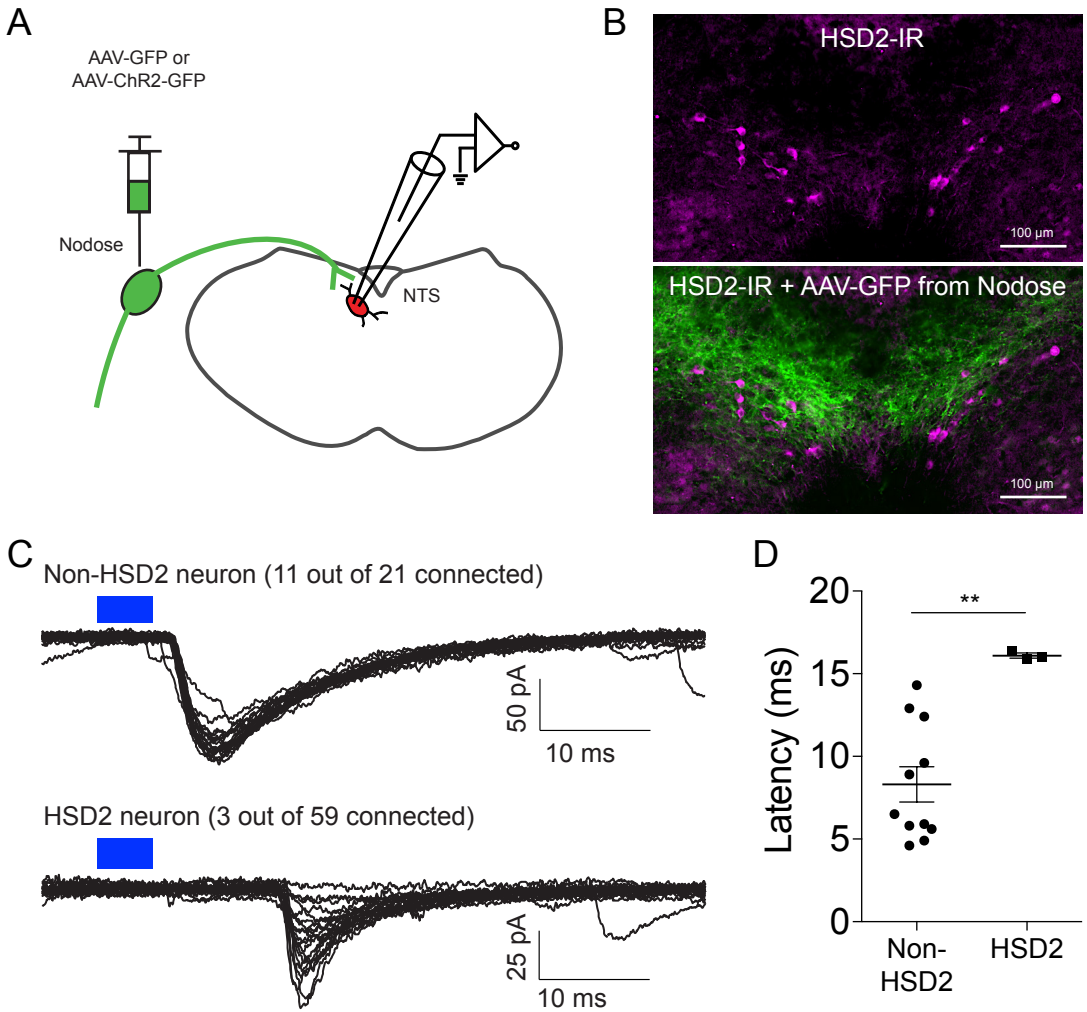

Figure S2



**Figure S2, related to Figure 1: ChR2-assisted circuit mapping of vagal afferent inputs to NTS<sup>HSD2</sup> neurons.**

Data are presented as mean  $\pm$  SEM.

**A)** Schematic of AAV-GFP or AAV-ChR2-GFP nodose injections and experimental design for ChR2-assisted circuit mapping.

**B)** HSD2 immunoreactivity (HSD2-IR) in the NTS (top) and an overlay of vagal afferent fibers from AAV-GFP nodose injections (bottom).

**C)** Representative CRACM recordings from NTS Non-HSD2 (top) and HSD2 (bottom) neurons from *Hsd11b2-Cre::Ai9tdTomato* mice exhibiting light-evoked EPSCs (n = 4 mice). ChR2-expressing fibers around the recorded cell were photostimulated with blue light through the microscope objective.

**D)** Latency of light-evoked responses from NTS Non-HSD2 and HSD2 neurons.

Unpaired two-tailed t-test, \*\*P < 0.01.

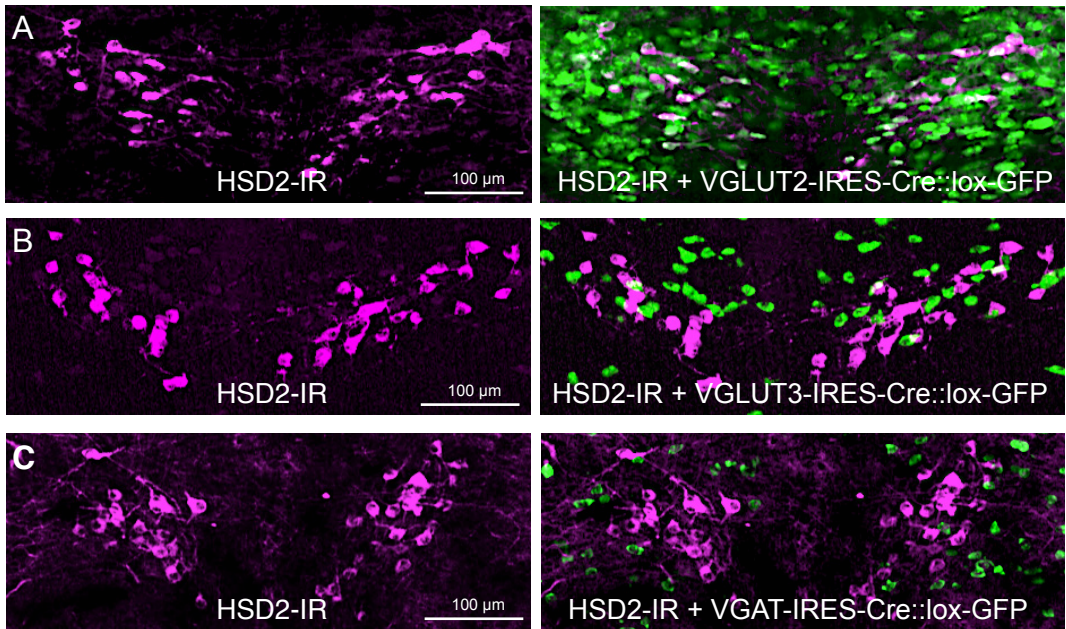

Figure S3

**Figure S3, related to Figure 2: NTS<sup>HSD2</sup> neurons express VGLUT2.**

NTS HSD2 immunoreactivity (HSD2-IR; all left panels) co-labeled with:

- A)** VGLUT2-IRES-Cre::lox-GFP reporter mouse expression.
- B)** VGLUT3-IRES-Cre::lox-GFP reporter mouse expression.
- C)** VGAT-IRES-Cre::lox-GFP reporter mouse expression.

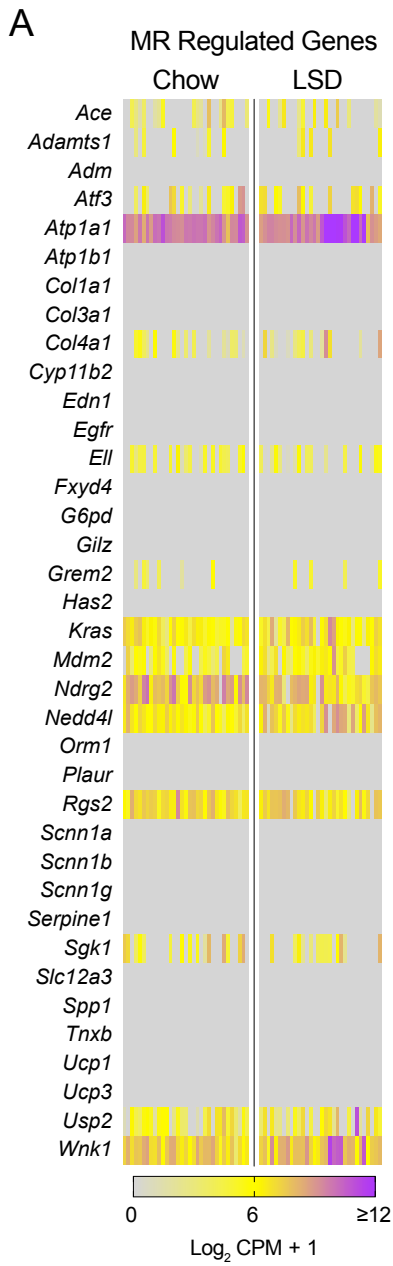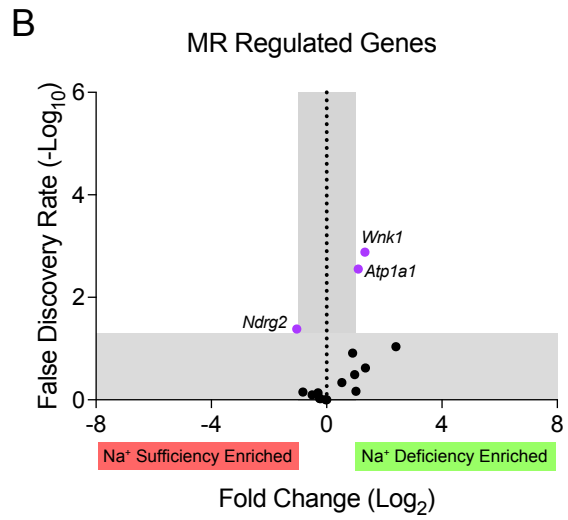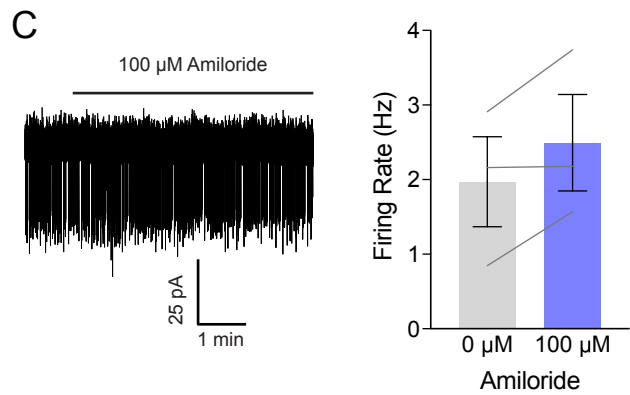

Figure S4

**Figure S4, related to Figure 2: NTS<sup>HSD2</sup> neuron RNA-Seq analysis of MR-regulated genes.**

**A)** Heatmap showing single neuron expression patterns for MR-regulated genes (Viengchareun et al., 2007).

**B)** Volcano plot of MR-regulated genes affected by sodium deprivation. Dots outside the grey shaded region colored purple represent ion channel genes with significantly altered expression in response to sodium deprivation ( $\text{Log}_2$  Fold Change  $> 1$  or  $< -1$ , and False Discovery Rate  $< 0.05$ ).

**C)** Representative cell-attached recording and summary of action potential firing rates of NTS<sup>HSD2</sup> neurons from sodium-deprived mice before and after bath application of amiloride ( $n = 3$  neurons from 2 mice). Data are presented as mean  $\pm$  SEM.

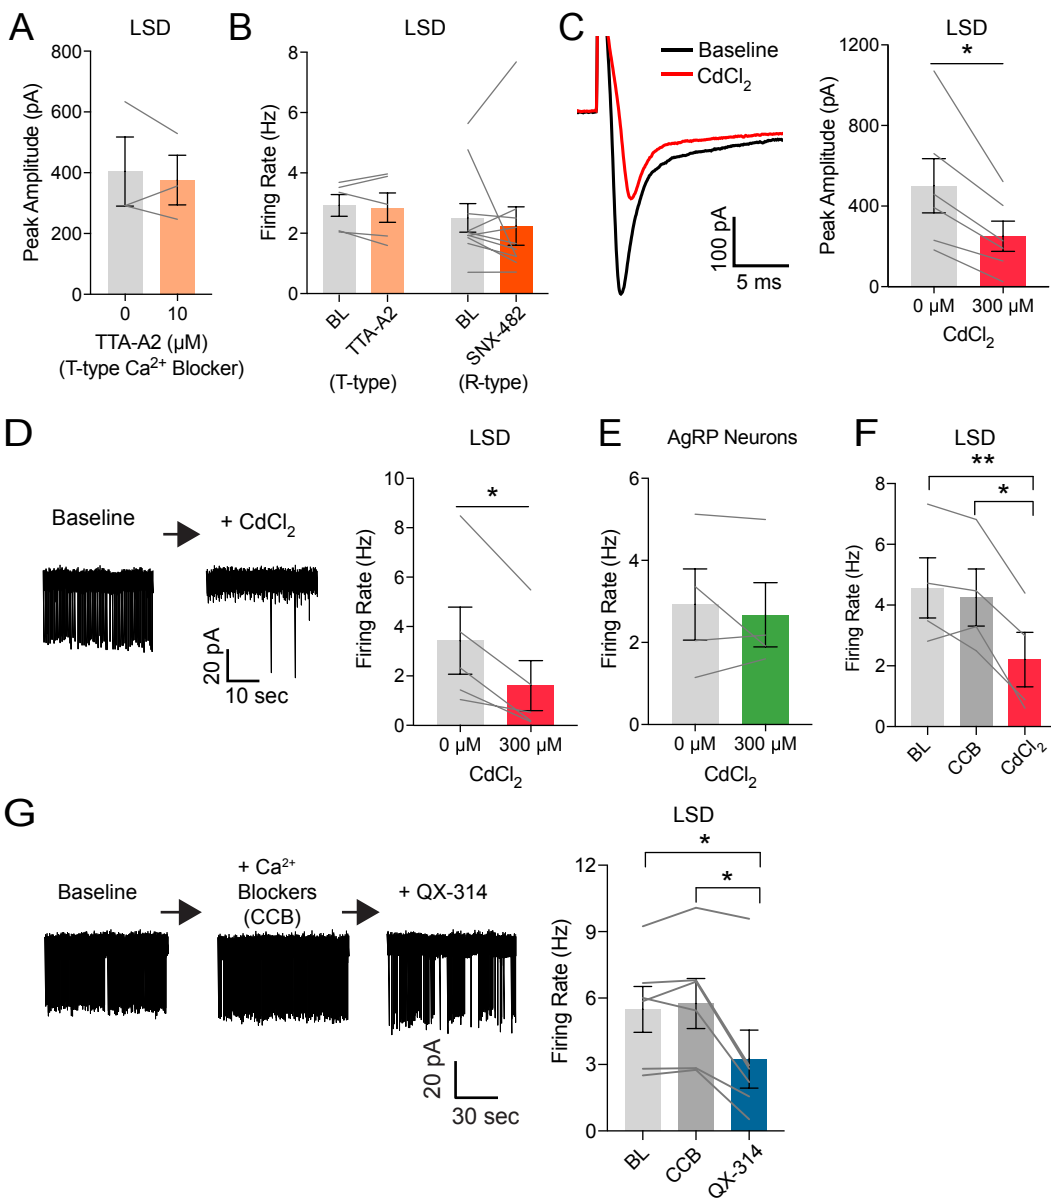

Figure S5

**Figure S5, related to Figure 4: State-dependent NTS<sup>HSD2</sup> activity is mediated by TTX-resistant sodium channels but not T-type calcium channels.**

All recordings were performed in the presence of synaptic blockers. Data are presented as mean  $\pm$  SEM.

**A)** NTS<sup>HSD2</sup> neuron peak evoked current amplitude from low sodium diet (LSD) fed mice before and after application of TTA-A2 (n = 3 neurons from 2 mice).

**B)** NTS<sup>HSD2</sup> neuron action potential firing rates from low sodium diet (LSD) fed mice before (baseline; BL) and after application of TTA-A2 (10  $\mu$ M; n = 5 neurons from 2 mice) or SNX-482 (300 nM; n = 10 neurons from 5 mice).

**C)** Example traces (left) and summary (right) of peak evoked current amplitude before and after CdCl<sub>2</sub> treatment of NTS<sup>HSD2</sup> neurons from LSD fed mice (n = 6 neurons from 3 mice). Paired two-tailed t-test, \*P < 0.05.

**D)** Representative cell-attached recording (left) and summary (right) of action potential firing rates in NTS<sup>HSD2</sup> neurons from LSD fed mice before and after CdCl<sub>2</sub> application (n = 5 neurons from 3 mice). Paired two-tailed t-test, \*P < 0.05.

**E)** Action potential firing rates of hypothalamic AgRP neurons from fasted mice following CdCl<sub>2</sub> treatment (n = 4 neurons from 2 mice).

**F)** Action potential firing rates of NTS<sup>HSD2</sup> neurons from LSD fed mice at baseline (BL), after calcium channel blocker cocktail (CCB) treatment, and after CdCl<sub>2</sub> application (n = 4 neurons from 2 mice). Repeated measures ANOVA with posthoc analysis by Tukey's multiple comparisons test, \*P < 0.05, \*\*P < 0.01.

**G)** Representative cell-attached recording (left) and summary (right) of action potential firing rates of NTS<sup>HSD2</sup> neurons from sodium-deprived mice at baseline (BL), after calcium channel blocker cocktail (CCB) treatment, and after QX-314 application (n = 6 neurons from 3 mice). Repeated measures ANOVA with posthoc analysis by Tukey's multiple comparisons test, \*P < 0.05.

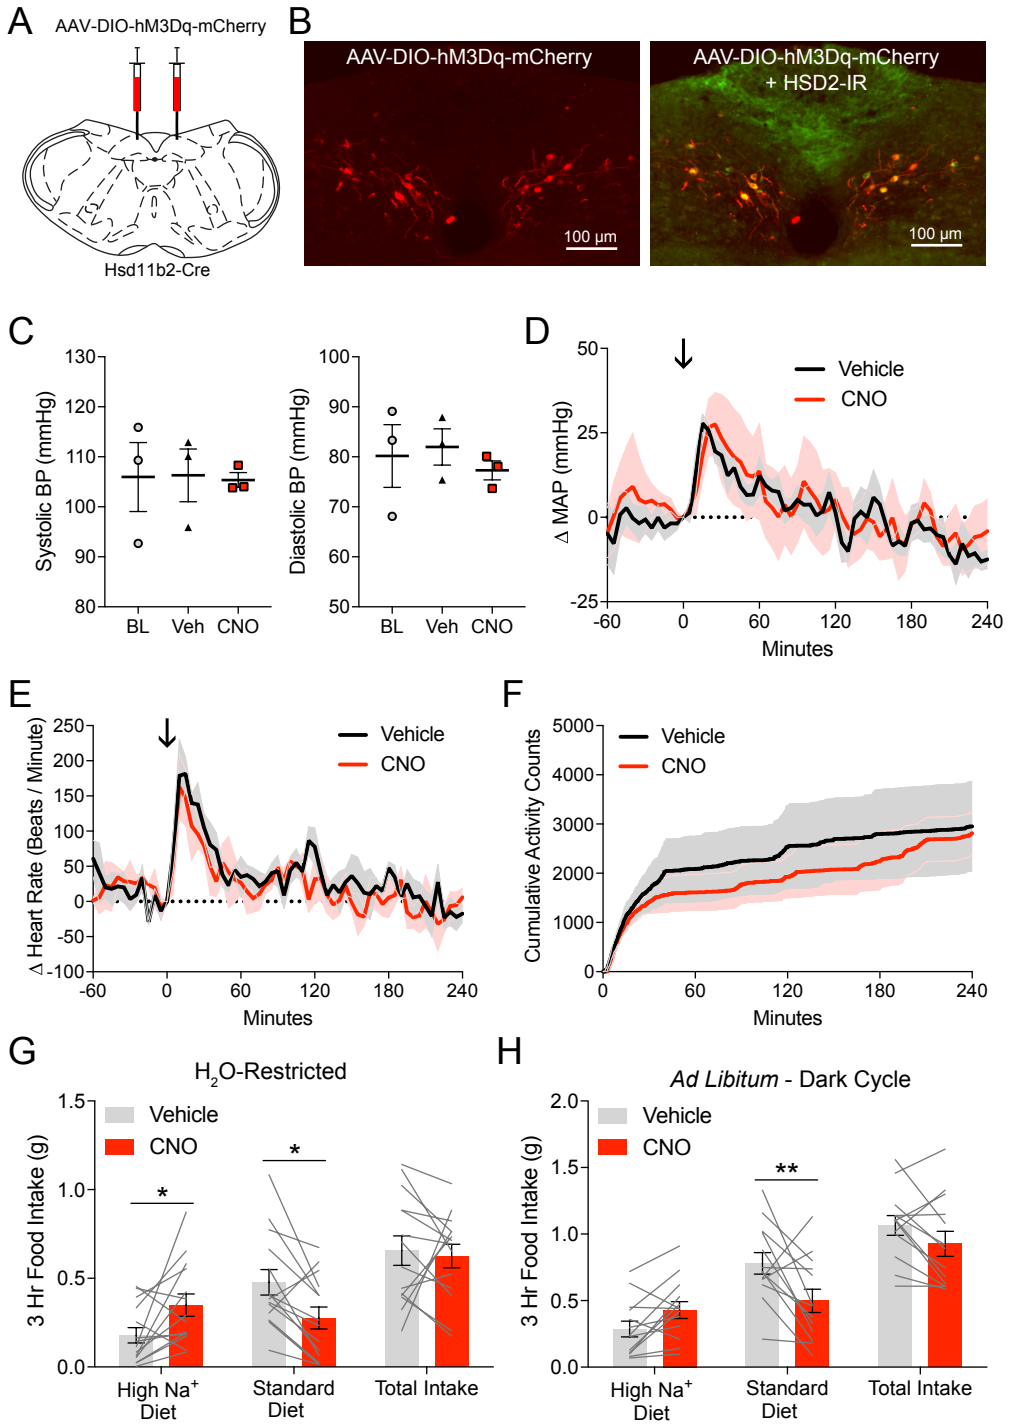

Figure S6



**Figure S6, related to Figure 6: NTS<sup>HSD2</sup> neuron activation affects food intake, but not cardiovascular function in euhydrated animals.**

Data are presented as mean ± SEM.

**A)** Schematic of AAV-DIO-hM3Dq-mCherry injections.

**B)** Validation of hM3Dq expression in NTS<sup>HSD2</sup> neurons from *Hsd11b2*-Cre mice (left) with HSD2 immunoreactivity (HSD2-IR; right).

**C)** Systolic blood pressure (left) and diastolic blood pressure (right) at baseline (BL), after vehicle injection (Veh), and following CNO/hM3Dq stimulation (CNO) of NTS<sup>HSD2</sup> neurons in anesthetized animals (n = 3 mice).

**D)** Change in mean arterial pressure from telemetric recordings following chemogenetic stimulation of NTS<sup>HSD2</sup> neurons. Arrow denotes ip injection of vehicle or CNO (n = 4 mice).

**E)** Change in heart rate from telemetric recordings following chemogenetic stimulation of NTS<sup>HSD2</sup> neurons. Arrow denotes ip injection of vehicle or CNO (n = 3 mice).

**F)** Change in locomotor activity from telemetric recordings following chemogenetic stimulation of NTS<sup>HSD2</sup> neurons (n = 4 mice).

**G)** Two-diet choice food intake of high sodium (High Na<sup>+</sup>) diet and standard diet following CNO/hM3Dq stimulation of NTS<sup>HSD2</sup> neurons in H<sub>2</sub>O-restricted mice (n = 14 mice). Two-way repeated measures ANOVA followed by Sidak's multiple comparisons test, \**P* < 0.05.

**H)** Two-diet choice food intake of High Na<sup>+</sup> diet and standard diet following CNO/hM3Dq stimulation of NTS<sup>HSD2</sup> neurons at the onset of the dark-cycle (n = 13 mice). Two-way repeated measures ANOVA followed by Sidak's multiple comparisons test, \*\**P* < 0.01.

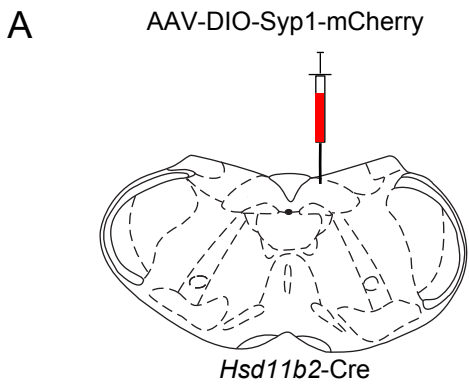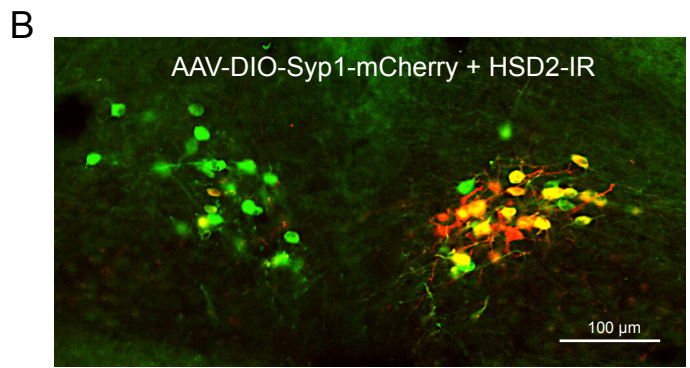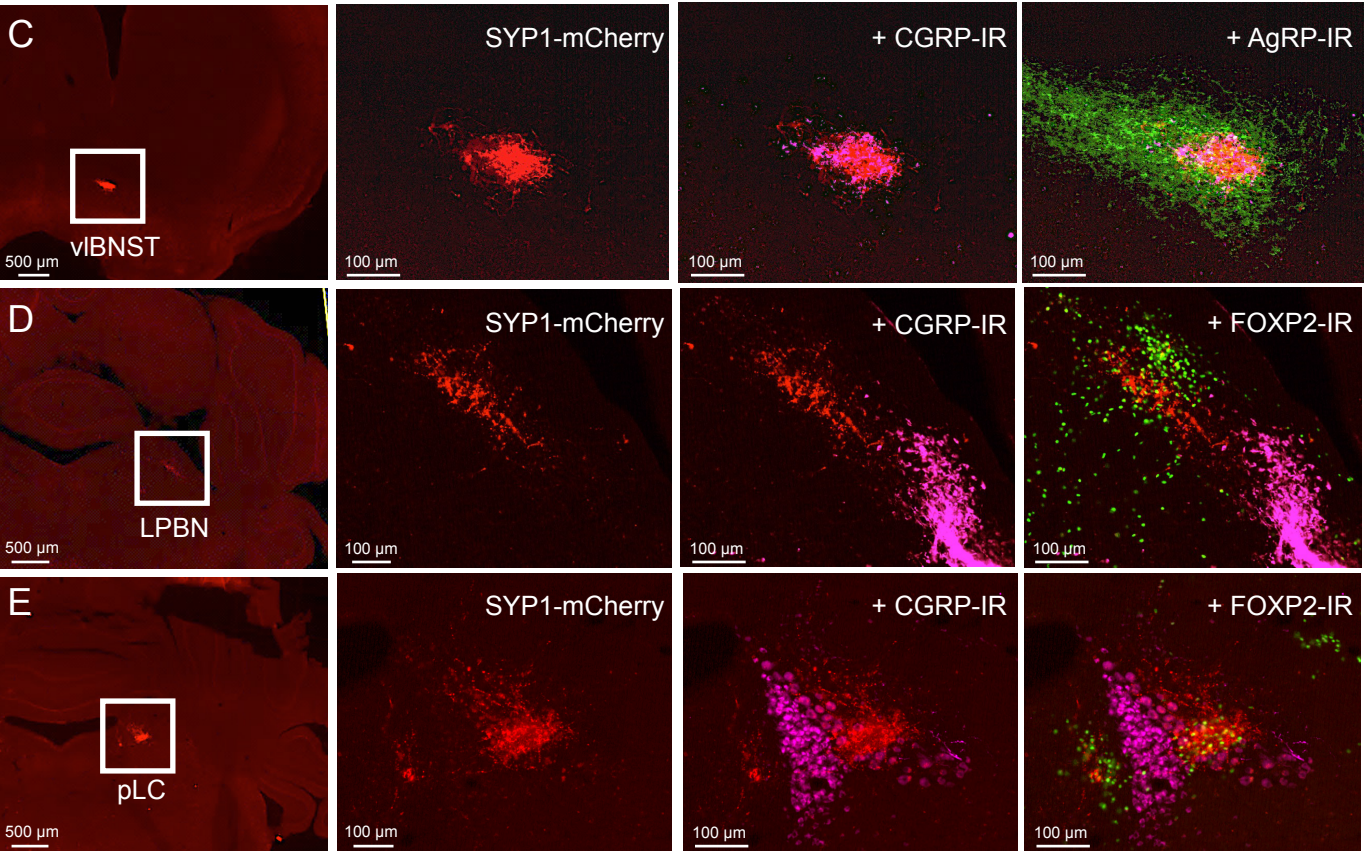

Figure S7

**Figure S7, related to Figure 8: NTS<sup>HSD2</sup> neuron projection mapping.**

**A)** Schematic of AAV-DIO-Syp1-mCherry injections.

**B)** Validation of Syp1-mCherry expression in NTS<sup>HSD2</sup> neurons from *Hsd11b2-Cre* mice with HSD2 immunoreactivity (HSD2-IR).

**C)** NTS<sup>HSD2</sup> neuron projections to the vBNST (left and middle-left). These projections overlap with both calcitonin gene-related peptide (CGRP)-IR (middle-right) and AgRP-IR (right).

**D)** NTS<sup>HSD2</sup> neuron projections to the LPBN (left and middle-left). These projections avoid the CGRP-IR field (middle-right), but do overlap with FOXP2-IR (right).

**E)** NTS<sup>HSD2</sup> neuron projections to the pLC (left and middle-left). These projections avoid the locus coeruleus labeled by CGRP-IR (middle-right), but overlap with FOXP2-IR (right) in this region.
